# Supplementary material for: Interplay between RNA-binding protein HuR and Nox4 as a novel therapeutic target in diabetic kidney disease
Source: PubMed Central journal article supplement — Mol Metab. 2020 Feb 28;36:100968. doi: 10.1016/j.molmet.2020.02.011 (PMC7115155; doi:10.1016/j.molmet.2020.02.011), 2020-02-28
Supplement: mmc1.pdf [file mmc1.pdf]

**Supplementary Figure 1. HuR is required for HG-induced increase in ROS generation.** MCs cells were transiently transfected with siRNA against HuR. 48 hours after transfection, MCs were treated with high glucose or control for 1 hour. Then the cells were immediately incubated with DCF or DHE dye at working concentration for 30 mins, and subjected to confocal imaging.

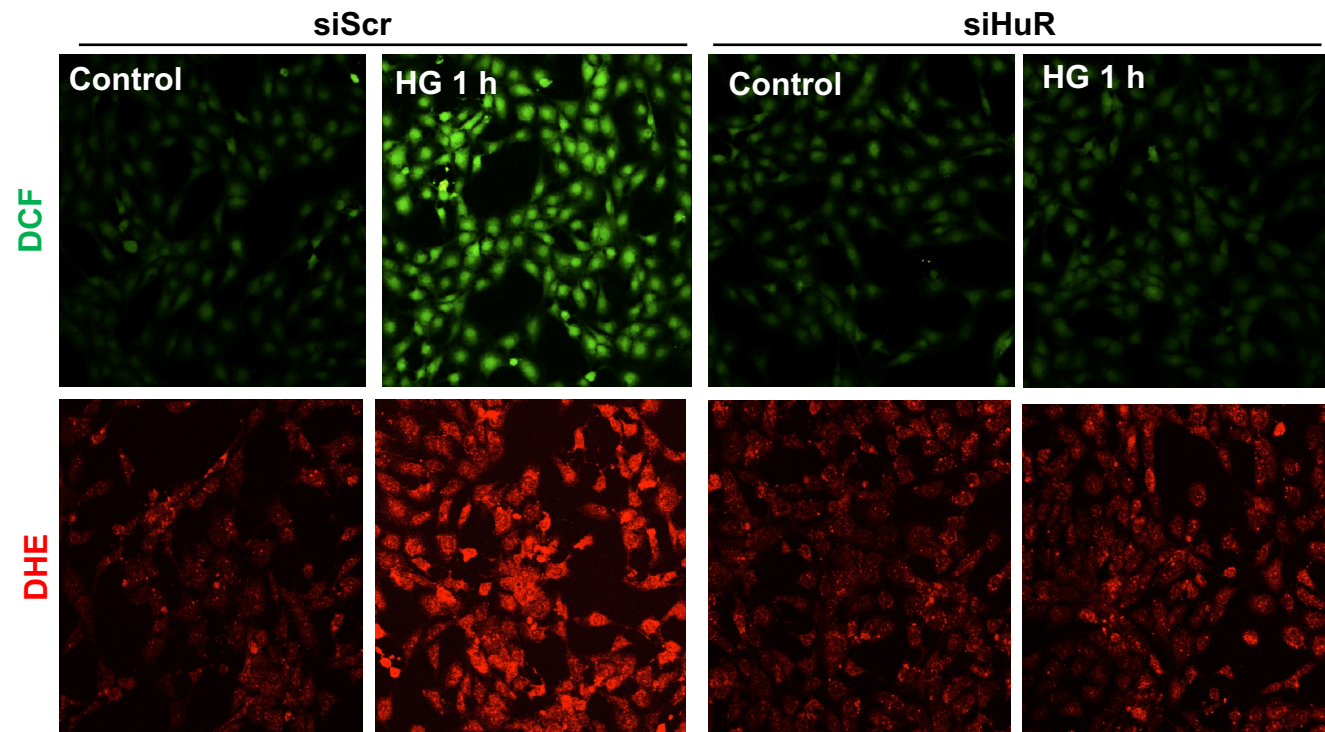

**Supplementary Figure 2.** Nox4 mRNA 3' untranslated region (3'-UTR) contains HuR binding AU-rich elements (AREs).

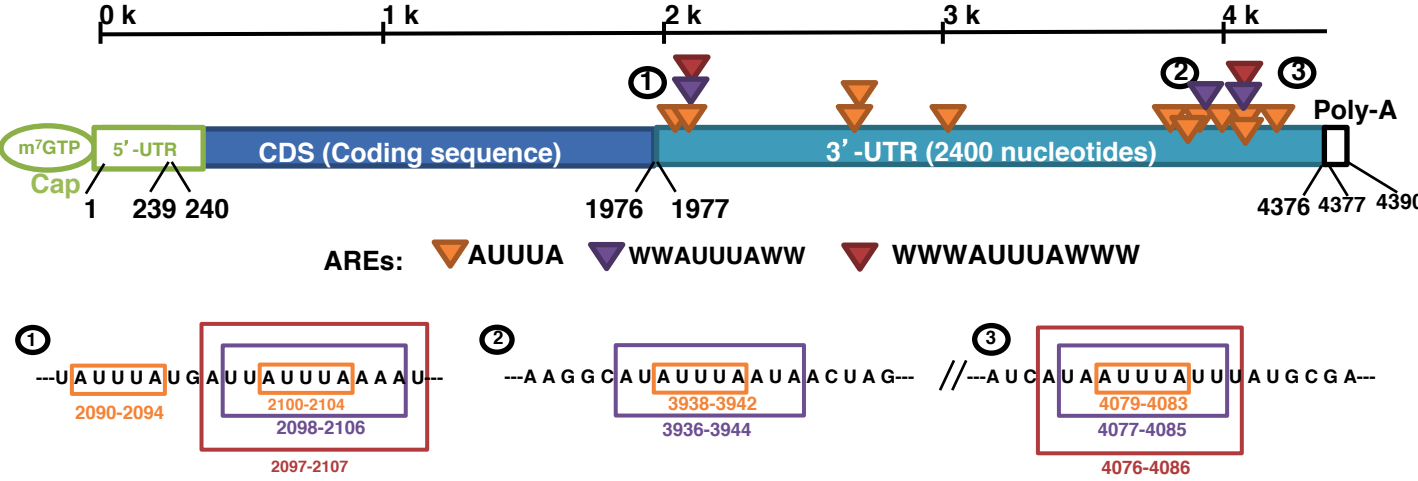

Online database for the investigation of AREs: <http://rna.tbi.univie.ac.at/cgi-bin/AREsite.cgi>

**Supplementary Figure 3.** The mutations on wild type Nox4 3'UTR-pEZX-MT01 that disrupts ARE regions, by site-direct mutagenesis.

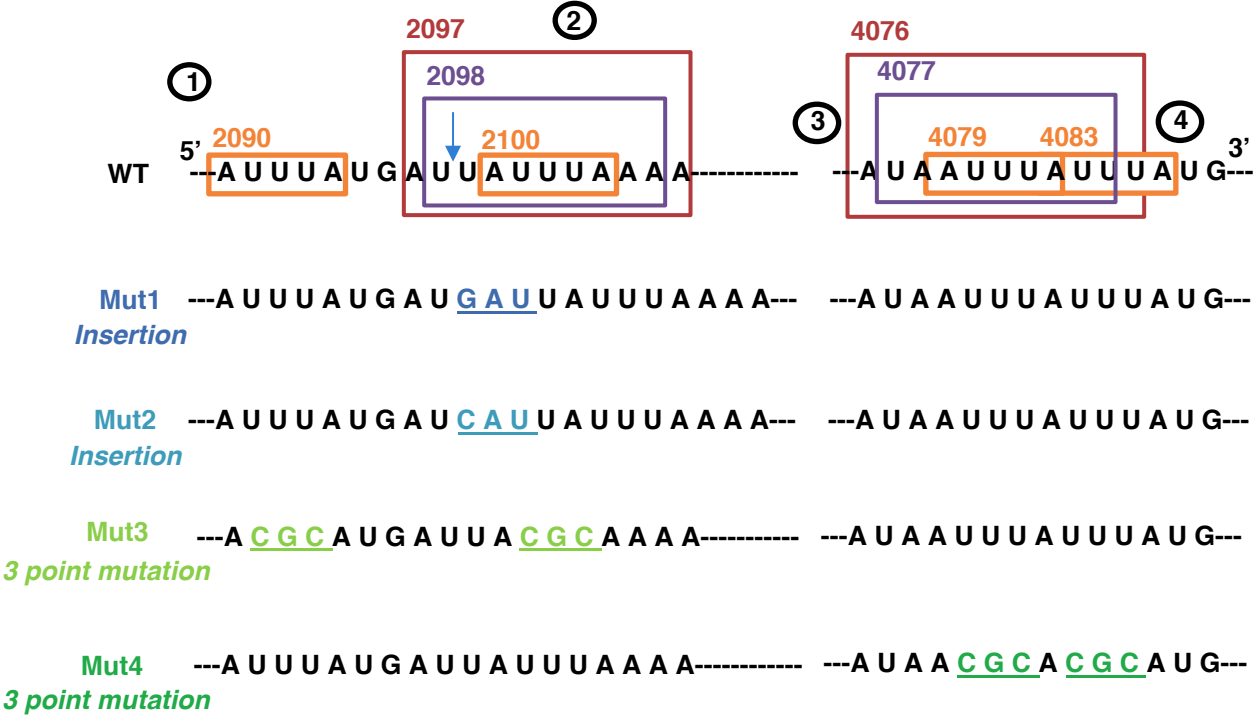

**Supplementary Figure 4.** Nox4 mRNA is also present in the IP complex with HuR antibody in rat, and the affinity is increased after STZ induction. Kidney cortex tissues were isolated from control and STZ-induced diabetic rats. The total protein lysates were incubated with HuR antibody or IgG as control. The presence of Nox4 were detected by RT-PCR from the RNAs in immunoprecipitated complex.

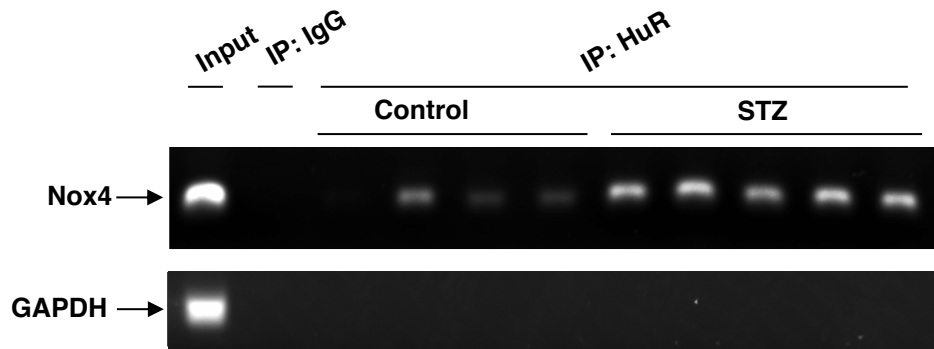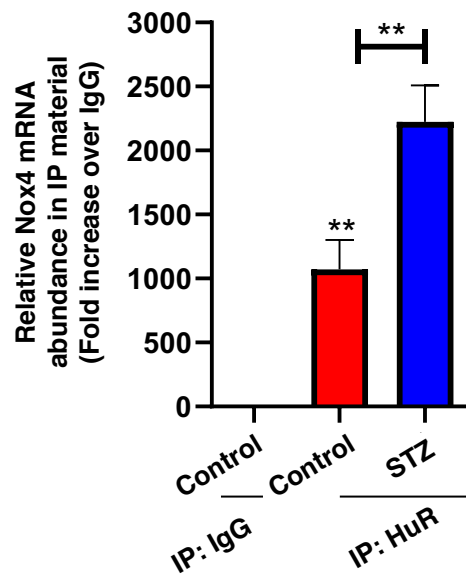

**Supplementary Figure 5. HuR is co-localized with Nox4 in glomerulus, and the intensities for both protein are increased in diabetic animal.** Kidney frozen sections were prepared from both control and STZ-induced high blood glucose mice. The sections were stained with Nox4 and HuR simultaneously and images were taken under a confocal microscope. DAPI was used as counter staining for nuclei. Scale bar = 100 mm.

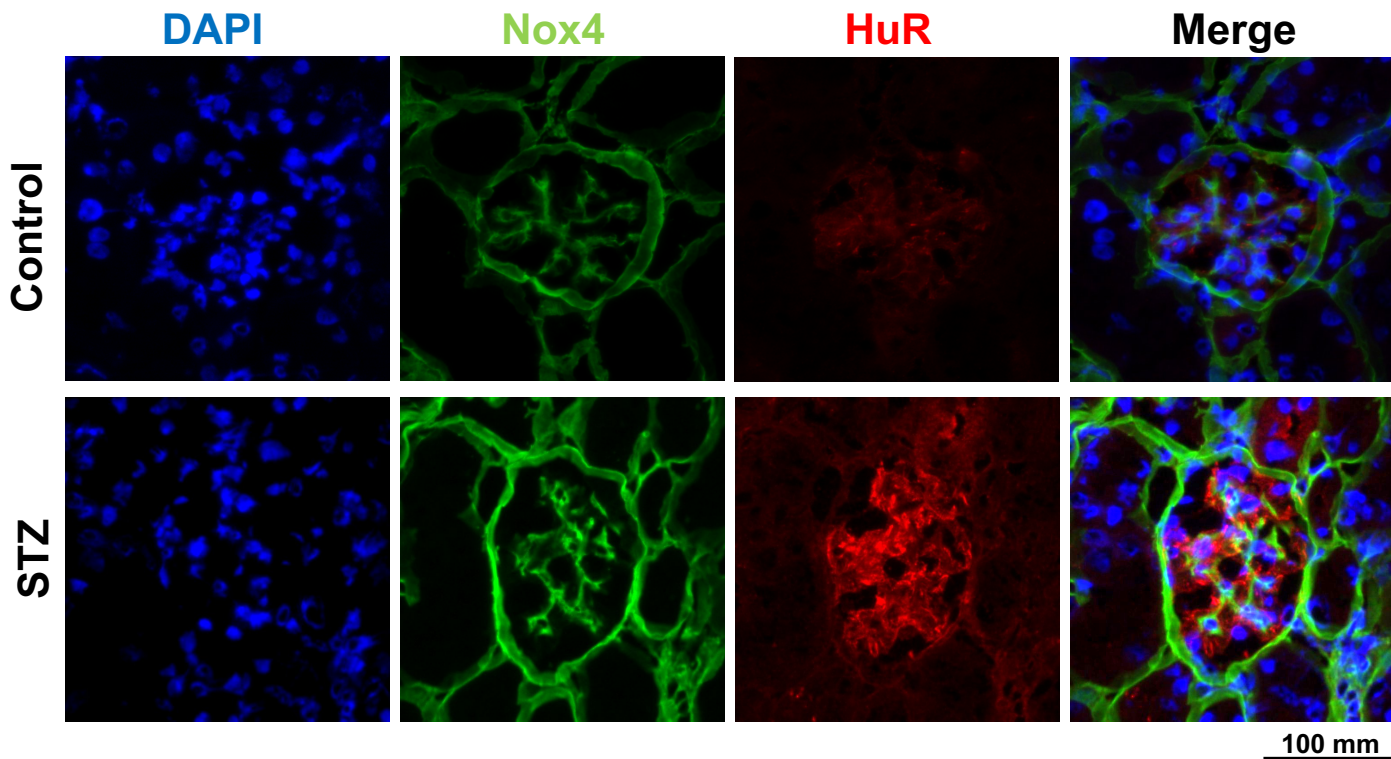

**Supplementary Table-1.** RNA sequence used in RNA pull down experiments.

| RNA mol.      | Sequence                                | AREs Region |
|---------------|-----------------------------------------|-------------|
| Biot RNA1 wt  | U <u>AUUUA</u> UGAUU <u>AUUUA</u> AAAU  | 2089-2108   |
| Biot RNA1 Mut | U <u>ACGCA</u> UGAUU <u>ACGCA</u> AAAU  |             |
| Biot RNA2 wt  | AAGGCAU <u>AUUUA</u> AUAACUAG           | 3931-3950   |
| Biot RNA2 Mut | AAGGCAU <u>ACGCA</u> AUAACUAG           |             |
| Biot RNA3 wt  | AUCAUA <u>AUUUAUUUA</u> AUGCGA          | 4073-4092   |
| Biot RNA3 Mut | AUCAUA <u>ACGCA</u> <u>ACGCA</u> AUGCGA |             |

**Supplimentary Table-2.** Primer sequences for generating hNox4-3UTR mutants

| Mutants                      | Primers | Sequence                        |
|------------------------------|---------|---------------------------------|
| Mut-1 (2098GAT)              | Forward | GATTATTTAAAATGGAAATGTGAGAATG    |
|                              | Reverse | ATCATAAATAAGAAAACCTTACTATTC     |
| Mut-2 (2098CAT)              | Forward | CATTATTTAAAATGGAAATGTGAGAATG    |
|                              | Reverse | ATCATAAATAAGAAAACCTTACTATTC     |
| Mut-3<br>(2091/2101_mut_CGC) | Forward | TTACGCAAAAATGGAAATGTGAGAATGTG   |
|                              | Reverse | TCATGCGTAAGAAAACCTTACTATTCTTTGG |
| Mut-4<br>(4079/4085_mut_CGC) | Forward | CGCATGCGATCATATTAATAGACC        |
|                              | Reverse | TGCGTTATGATCAGTATAGAGTCAGTATTG  |
